# Supplementary material for: Size-controlled synthesis of monodisperse zinc gallium oxide particles via coprecipitation under hydrothermal conditions using trisodium citrate
Source: Royal Society of Chemistry journal article supplement (doi:10.1039/d5ce00952a), 2025-11-18
Supplement: d5ce00952a1.pdf [file d5ce00952a1.pdf]

Electronic Supplementary Information (ESI)

**Size-controlled synthesis of monodisperse zinc gallium oxide particles via coprecipitation under a hydrothermal condition using trisodium citrate**

Fumiyuki Shiba,\* Naoki Koyama and Yusuke Okawa

Department of Materials Science, Chiba University  
1-33 Yayoicho, Inageku, Chiba 263-8522, Japan

\*E-mail: shiba@faculty.chiba-u.jp

## HR-TEM image of the ZGO particle

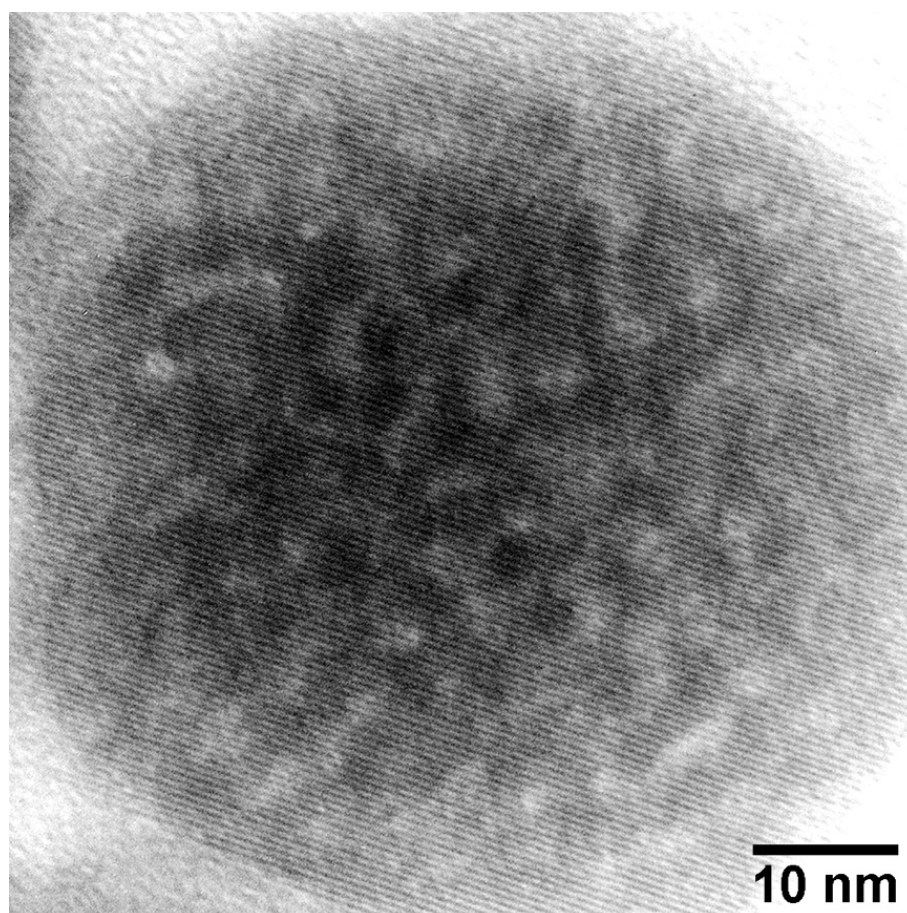

**Fig. S1** HR-TEM image of the ZGO particle hydrothermally prepared in the presence of trisodium citrate at 150 °C for 24 h. The reaction condition of  $C_{\text{Ga}}/C_{\text{Zn}} = 2.0$  ( $C_{\text{Zn}} + C_{\text{Ga}} = 30$  mmol/L) and  $C_{\text{cit}} = 30$  mmol/L ( $f_{\text{Ga/Zn}} = 1.70$ ).

## TEM-EDX spectra for the ZGO particles

Fig. S2 indicates TEM-EDX spectra, obtained with EDAX Genesis XM2T equipped to the Hitachi H-7650 TEM, for the ZGO particles hydrothermally synthesized at  $C_{\text{Ga}}/C_{\text{Zn}} = 2.0$ . The peak intensities estimate the Ga/Zn atomic ratio as  $f_{\text{Ga/Zn}} = 1.89$  and  $1.52$  for  $C_{\text{cit}} = 0$  mmol/L and  $40$  mmol/L, respectively. The values agree with those estimated from the AAS measurement of the supernatant solutions ( $f_{\text{Ga/Zn}} = 1.90$  and  $1.55$  for  $C_{\text{cit}} = 0$  mmol/L and  $40$  mmol/L, respectively).

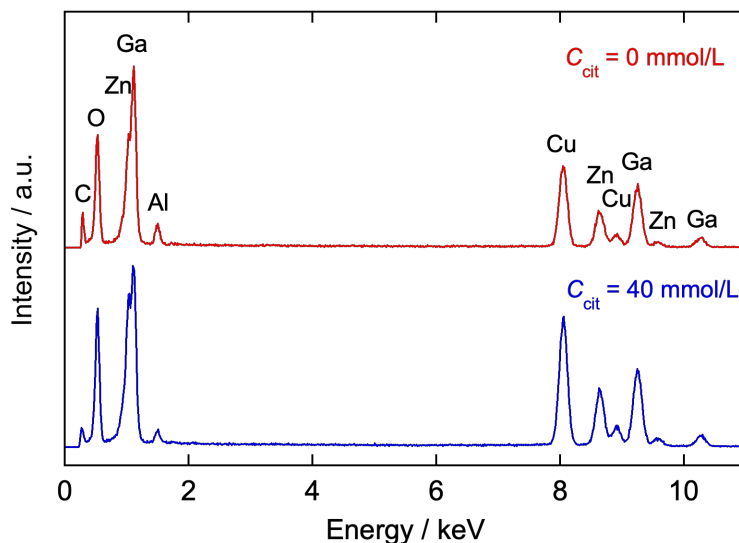

**Fig. S2** TEM-EDX spectra of the ZGO particles synthesized at  $C_{\text{Ga}}/C_{\text{Zn}} = 2$  in the absence and presence of  $\text{Na}_3\text{-Cit}$  ( $150^\circ\text{C}$  for  $24$  h). The Cu and Al signals are derived from the sheet mesh and the specimen folder, respectively.

## The white precipitate formed at $40^\circ\text{C}$ in the absence of $\text{Na}_3\text{-Cit}$

The white precipitate for characterization was prepared in the same manner as the ZGO synthesis without applying hydrothermal treatment in the absence of  $\text{Na}_3\text{-Cit}$  ( $C_{\text{Zn}} + C_{\text{Ga}} = 30$  mmol/L,  $C_{\text{Ga}}/C_{\text{Zn}} = 2$ ,  $C_{\text{NaOH}} = 0.084$  mmol/L,  $C_{\text{cit}} = 0$  mmol/L). After mixing the reactant solutions and keeping them at  $40^\circ\text{C}$  under magnetic stirring for  $60$  min, the precipitate formed was repeatedly washed with distilled water using a centrifuge.

The XRD pattern of the white precipitate is indicated in Fig. S3, suggesting the precipitate is the layered double hydroxide (LDH), rather than the spinel ZGO phase. If assuming the rhombohedral lattice ( $R\bar{3}m$ ) as literature, the peaks at  $2\theta = 11.8^\circ$  and  $23.7^\circ$  of the  $003$  and  $006$  reflections, respectively, enable us to estimate the lattice parameter  $c$  as  $c = 22.5 \text{ \AA}$ , which agrees with the value in literature ( $c = 22.99 \text{ \AA}$ )<sup>1</sup>. The lattice parameter  $a$  is also close to the value in

the literature ( $a = 3.112 \text{ \AA}$ )<sup>1</sup> from the diffraction angle for the 012 reflection ( $2\theta = 34^\circ$ ). However, it includes some uncertainty due to its broad and somewhat asymmetrical peak profile. In addition, the 015 and 018 reflections, which are expected to appear at about  $39^\circ$  and  $46^\circ$ , respectively, are not clearly observed. The misalignment of the stacked hydroxide layer could cause it.

It should be noted that the XRD pattern, however, does not ensure the white precipitate consists of a single phase of the LDH, as amorphous solids indicate no clear peaks of reflection, even if they are present. Rather, it would be reasonable to consider that the present white precipitate also contains amorphous hydroxides, since the fraction of  $\text{Ga}^{3+}$  seems to be too rich to regard it as a single LDH phase, as mentioned in the main text.

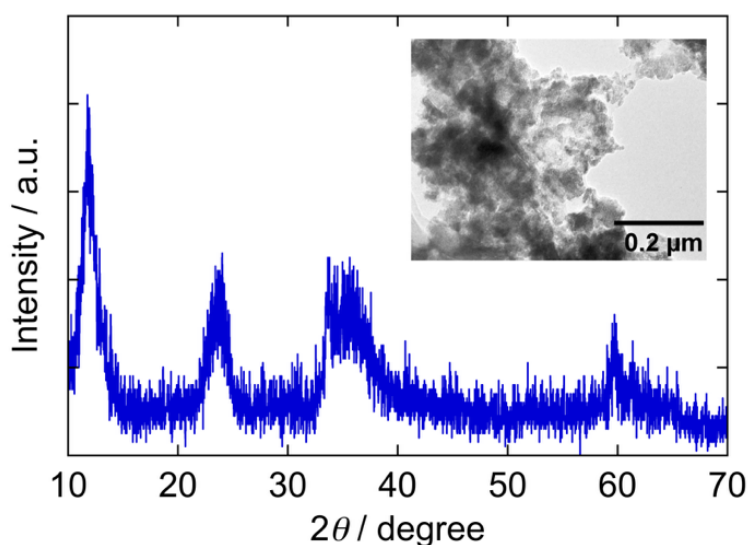

**Fig. S3** XRD pattern of the white precipitate formed at  $40^\circ\text{C}$  in the absence of  $\text{Na}_3\text{-Cit}$ . The inset is its TEM image.

### Estimation of the solubilities for $\text{Zn}(\text{OH})_2$ and $\text{Ga}(\text{OH})_3$ from the equilibrium constants

The solubility of  $\text{Zn}(\text{OH})_2$  precipitate in  $\text{NaOH}$  aqueous solution is governed by the equilibrium constants of the solubility product,  $K_{\text{sp}}$ , and the stability constants for hydroxide complexes,  $\beta_n$ . The equilibrium constants enable us to formulate the molar concentrations of the free  $\text{Zn}^{2+}$  ion and of its hydroxide complexes:

$$\begin{aligned} [\text{Zn}^{2+}] &= K_{\text{sp}}^{\text{Zn}} / [\text{OH}^-]^2 \\ [[\text{ZnOH}]^+] &= \beta_1^{\text{Zn}} [\text{Zn}^{2+}] [\text{OH}^-] \\ [[\text{Zn}(\text{OH})_2]] &= \beta_2^{\text{Zn}} [\text{Zn}^{2+}] [\text{OH}^-]^2 \end{aligned}$$

$$[[\text{Zn}(\text{OH})_3]^-] = \beta_3^{\text{Zn}}$$

$$[[\text{Zn}(\text{OH})_4]^{2-}] = \beta_4^{\text{Zn}}[\text{Zn}^{2+}][\text{OH}^-]^4$$

The molar solubility of  $\text{Zn}(\text{OH})_2$  precipitate,  $s^{\text{Zn}}$ , is the sum of the concentrations, thus

$$s^{\text{Zn}} = [\text{Zn}^{2+}] + [[\text{Zn}(\text{OH})_2]] + [[\text{Zn}(\text{OH})_3]^-] + [[\text{Zn}(\text{OH})_4]^{2-}]$$

$$= K_{\text{sp}}^{\text{Zn}} \left( \frac{\beta_1^{\text{Zn}}}{[\text{OH}^-]} + \beta_2^{\text{Zn}} + \beta_3^{\text{Zn}}[\text{OH}^-] + \beta_4^{\text{Zn}}[\text{OH}^-]^2 \right)$$

Similarly, the solubility of  $\text{Ga}(\text{OH})_3$  precipitate,  $s^{\text{Ga}}$ , is also given by

$$s^{\text{Ga}} = K_{\text{sp}}^{\text{Ga}} \left( \frac{\beta_1^{\text{Ga}}}{[\text{OH}^-]^2} + \beta_2^{\text{Ga}}[\text{OH}^-] + \beta_3^{\text{Ga}} + \beta_4^{\text{Ga}}[\text{OH}^-] \right)$$

As long as the hydroxide precipitate remains,  $[\text{Zn}^{2+}]$  and  $[\text{Ga}^{3+}]$  are functions of  $[\text{OH}^-]$  (thus of pH), as shown in Fig. S4, where the assumed values of equilibrium constants<sup>2</sup> are  $\text{p}K_{\text{sp}} = 17.0$ ,  $\log\beta_1 = 5.1$ ,  $\log\beta_2 = 11.1$ ,  $\log\beta_3 = 13.6$ , and  $\log\beta_4 = 14.9$  for  $\text{Zn}^{2+}$  and  $\text{p}K_{\text{sp}} = 35.2$ ,  $\log\beta_1 = 11.3$ ,  $\log\beta_2 = 21.8$ ,  $\log\beta_3 = 31.3$ , and  $\log\beta_4 = 38.8$  for  $\text{Ga}^{3+}$ . Also  $\text{p}K_{\text{w}} = 14.00$  was used to convert pH to  $[\text{OH}^-]$ .

To establish the homogeneous solution phase, the concentrations of  $\text{Zn}(\text{NO}_3)_2$  and  $\text{Ga}(\text{NO}_3)_3$  in the reacting solution must be lower than the respective solubility levels. The estimated solubility curves indicate that, at pH ~9, all  $\text{Ga}^{3+}$  ions are in the solution phase by sufficient formation of the anionic complex, but not for  $\text{Zn}^{2+}$  ions. Introducing citrate ions assists in increasing the solubility by forming citrate complexes with the metal ions, in addition to the hydroxide ones, to maintain the homogenous state before applying the hydrothermal treatment.

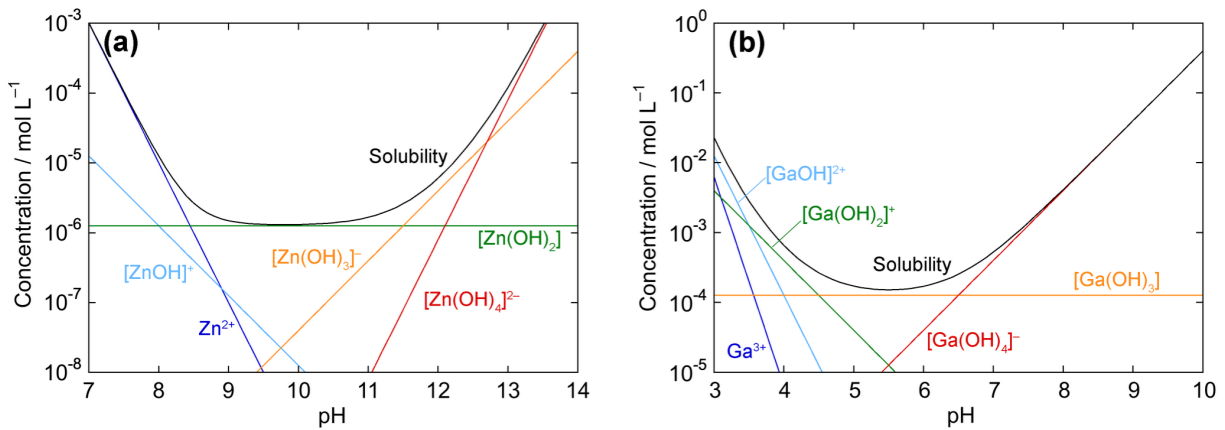

**Fig. S4** pH dependence of the solubility for (a)  $\text{Zn}(\text{OH})_2$  and (b)  $\text{Ga}(\text{OH})_3$  precipitate as the sum of the free metal ion and its hydroxide complexes estimated from the equilibrium constants at 25 °C.

**Size distributions of the ZGO particles synthesized under different Na<sub>3</sub>-Cit concentrations ( $C_{\text{Ga}}/C_{\text{Zn}} = 2.57$ ).**

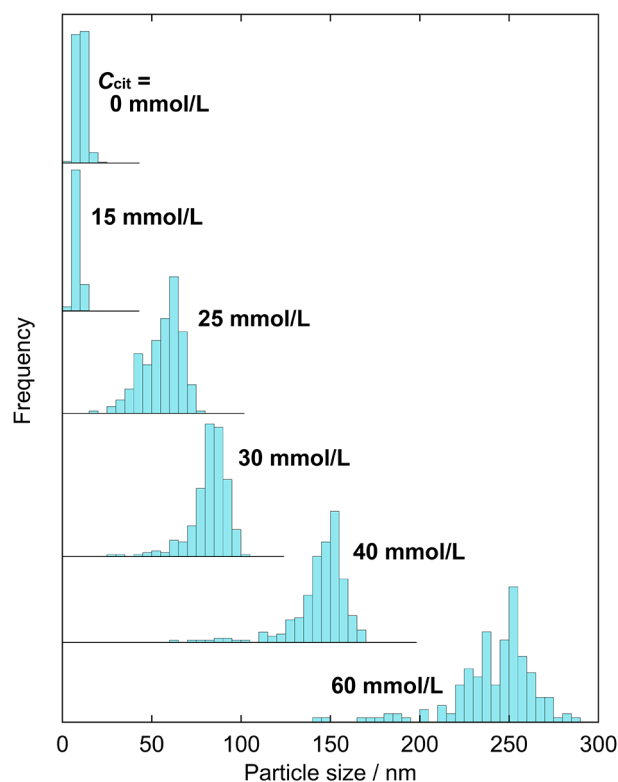

**Table S1** Estimated values of the average size ( $D$ ), the standard deviation of size ( $\sigma$ ), and the coefficient of variation (COV) from the size distribution data in Fig. S5 for the ZGO particles shown in Fig. 3.

| $C_{\text{cit}} / \text{mmol L}^{-1}$ | $D / \text{nm}$ | $\sigma / \text{nm}$ | COV / % |
|---------------------------------------|-----------------|----------------------|---------|
| 0                                     | 10              | 2.6                  | 25      |
| 15                                    | 8               | 1.7                  | 21      |
| 25                                    | 56              | 11                   | 19      |
| 30                                    | 83              | 10                   | 13      |
| 40                                    | 144             | 16                   | 11      |
| 60                                    | 242             | 23                   | 9       |

**Fig. S5** Histograms of particle size for the ZGO particles shown in Fig. 3, indicating the effect of Na<sub>3</sub>-Cit concentration on the size distribution. The width of each class is 5 nm.

## Effect of $f_{\text{Ga/Zn}}$ on the XRD pattern of the ZGO particles

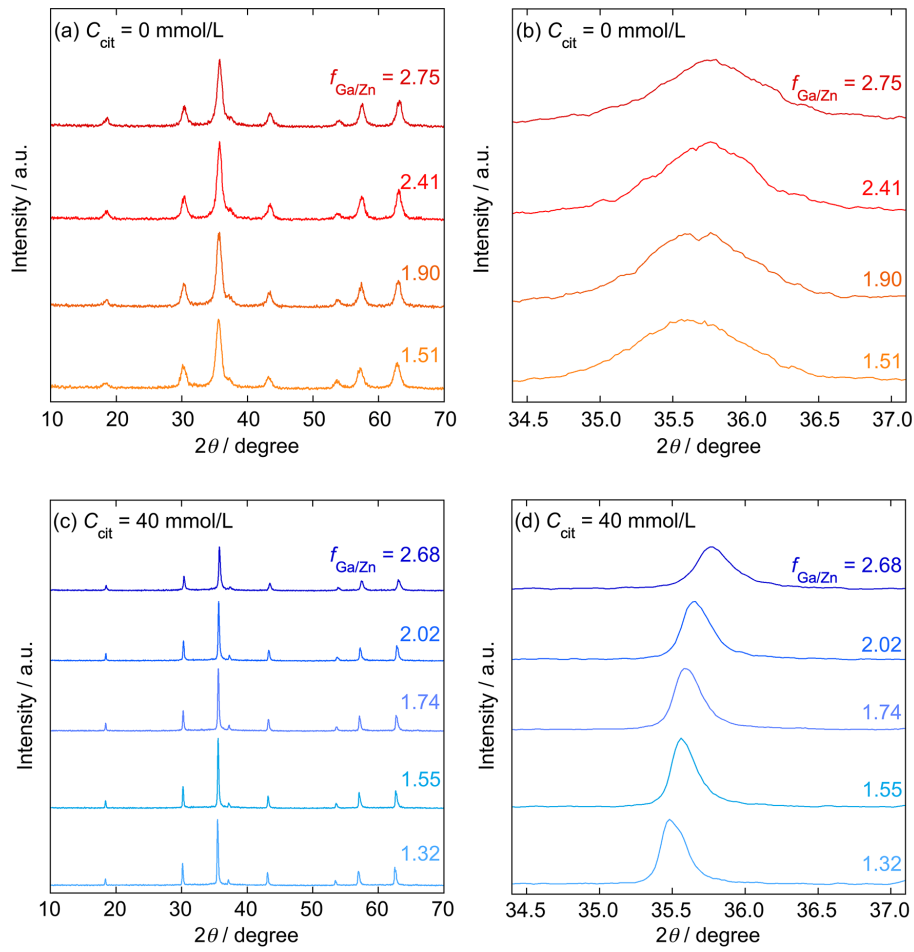

**Fig. S6** XRD patterns for the ZGO particles hydrothermally synthesized at (a)(b)  $C_{\text{cit}} = 0$  mmol/L and (c)(d)  $C_{\text{cit}} = 40$  mmol/L, where (a)(c) show the whole scanned range and (b)(d) expand around the strongest peak (the 311 reflection). The lattice parameter,  $a$ , in Fig. 6 in the main text is estimated from the relationship  $1/a^2 = (h^2 + k^2 + l^2)/d^2$  for the cubic lattice where  $h = 3$ ,  $k = 1$ , and  $l = 1$ . (Cu K $\alpha$  radiation,  $\lambda = 1.5418$  Å)

**Determination of the band gap energy for the ZGO particles with different  $f_{\text{Ga/Zn}}$  values.**

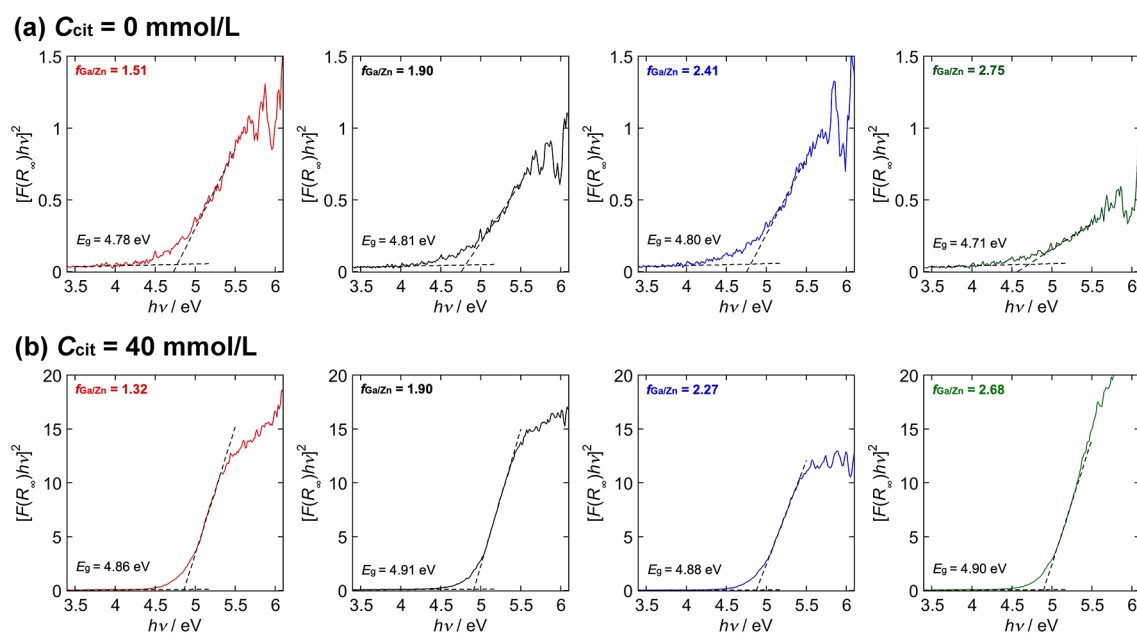

**Fig. S7** Tauc's plots for ZGO particles of different  $f_{\text{Ga/Zn}}$  obtained at (a)  $C_{\text{cit}} = 0$  mmol/L and (b)  $C_{\text{cit}} = 40$  mmol/L.

## Reference

1. K. Fuda, N. Kudo, S. Kawai and T. Matsunaga, *Chem. Lett.*, 1993, 777.
2. Y. F. Orlov and E. I. Belkina, *Russ. J. Inorg. Chem.*, 2011, **56**, 975.
